# Supplementary material for: Monolayer GaOCl: a novel wide-bandgap 2D material with hole-doping-induced ferromagnetism and multidirectional piezoelectricity
Source: Royal Society of Chemistry journal article supplement (doi:10.1039/d2nr02821b), 2022-01-01
Supplement: d2nr02821b1.pdf [file d2nr02821b1.pdf]

# **GaOCl monolayer: a novel wide-bandgap 2D material with hole-doping-induced ferromagnetism and multidirectional piezoelectricity**

Shujuan Jiang,<sup>a</sup> Huabing Yin,<sup>\* b</sup> and Guang-Ping Zheng<sup>\* a</sup>

*<sup>a</sup>. Department of Mechanical Engineering, The Hong Kong Polytechnic University, Hung Hom, Kowloon, Hong Kong 999077, China.*

*<sup>b</sup>. Institute for Computational Materials Science, School of Physics and Electronics, Henan University, Kaifeng 475004, China.*

\*E-mails: mmzheng@polyu.edu.hk (G.-P. Zheng); yhb@henu.edu.cn (H. Yin)

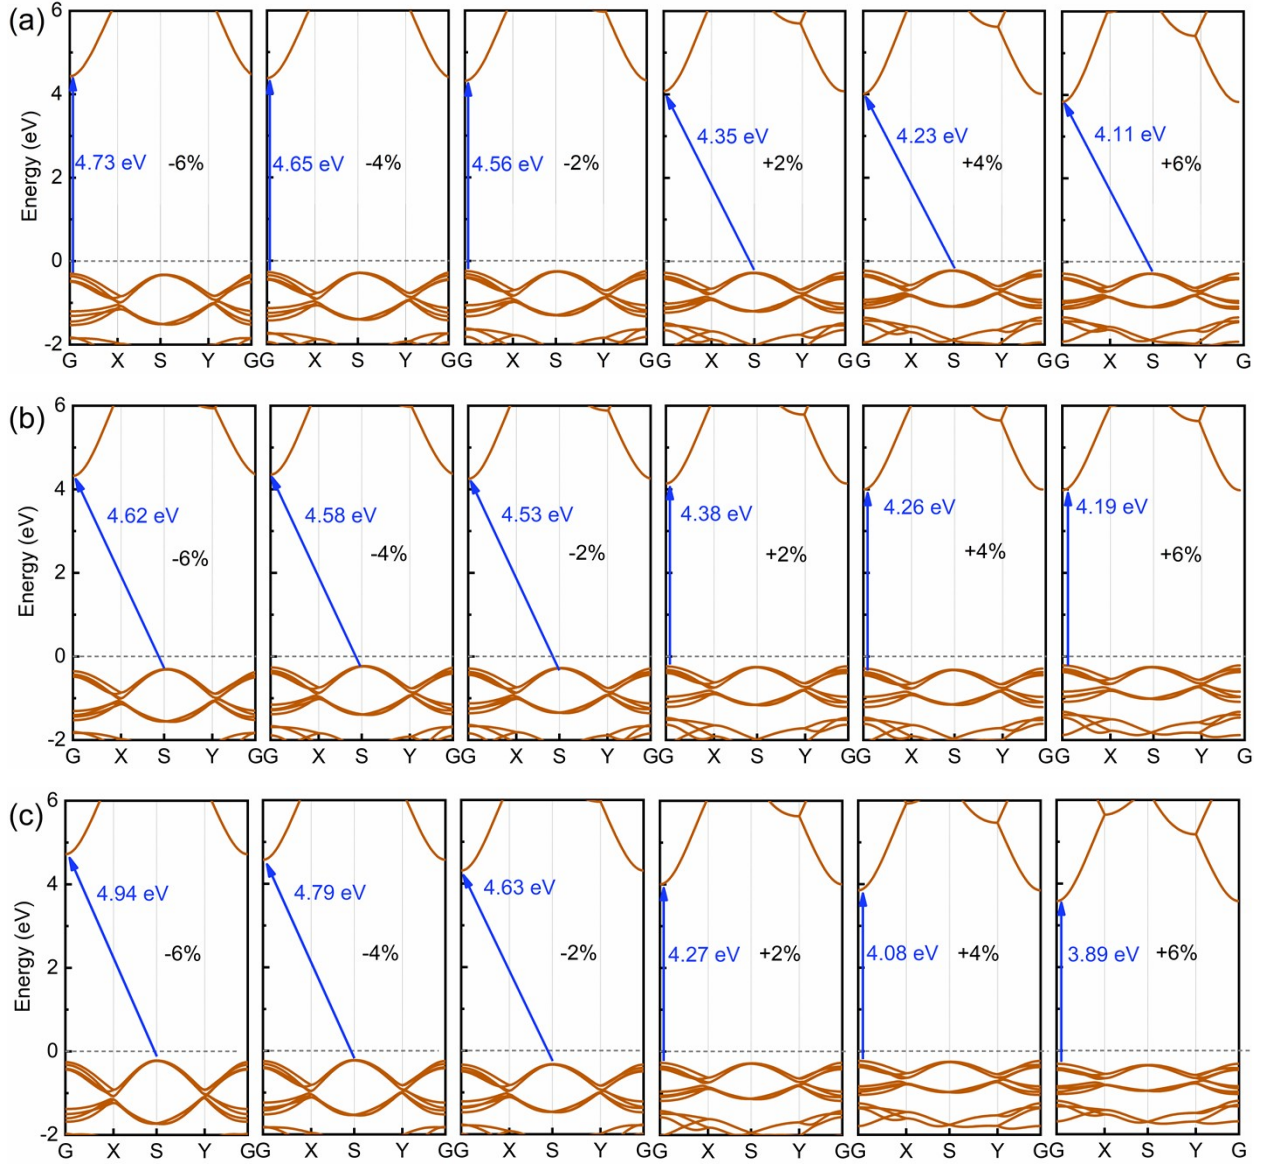

**Figure S1.** HSE06 band structures of GaOCl monolayer under the in-plane uniaxial strains varying from  $-6\%$  to  $+6\%$  along (a)  $x$ -, (b)  $y$ - and (c)  $xy$ -directions. The bandgaps are highlighted in blue. The Fermi level is at 0 eV.

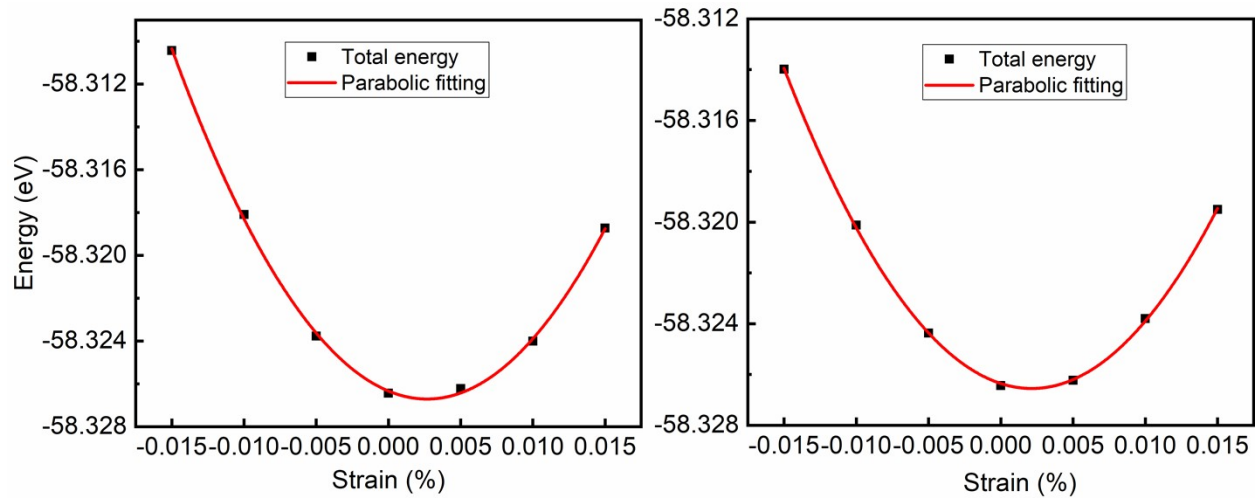

**Figure S2.** The total energy of GaOCl monolayer as a function of uniaxial strains applied along (a) x-direction, and (b) y-direction, respectively.
